# Supplementary material
Source: publisher figshare collection journal article supplement (https://acs.figshare.com/ndownloader/files/4451791)
Supplement: Supplementary file 1 [file 4451791]

# Preparation and Morphology Control of Block Copolymer/Metal Salt Hybrids via Solvent-Casting by Using a Solvent with Coordination Ability

Atsushi Noro, Yoshio Sageshima, Shigeo Arai, and Yushu Matsushita\*

[yushu@apchem.nagoya-u.ac.jp](mailto:yushu@apchem.nagoya-u.ac.jp) (Y.M.), [noro@nagoya-u.jp](mailto:noro@nagoya-u.jp) (A.N.)

## Synthesis of polystyrene-*b*-poly(4-vinylpyridine) (PS-P4VP)

PS-P4VP was synthesized via RAFT polymerization by using the monofunctional chain transfer agent (S-1-dodecyl-S'-( $\alpha,\alpha'$ -dimethyl- $\alpha'$ -acetic acid) trithiocarbonate) (Scheme 1). Both styrene and 4-vinylpyridine were purified by passing through an aluminum oxide column before use. Styrene (50.0g, 0.481 mol) was polymerized with a monofunctional CTA (0.351 g, 0.962 mmol) in bulk at 130 °C for 345 min as the first step. After deactivation of the macro-CTA with liquid nitrogen, PS-macro-CTA was purified with reprecipitation into methanol three times ( $M_n$  = 28000, PDI = 1.17 ). Then, 4-vinylpyridine (4VP) (19.7 g, 0.187 mol) was polymerized with AIBN (8.8 mg, 0.054 mmol) from the PS-macro-CTA (5.0 g, 0.178 mmol) at 70 °C in bulk for 80 min. After deactivation with liquid nitrogen, PS-P4VP was purified with reprecipitation into hexane multiple times ( $M_n$  = 37000, PDI = 1.24).

### Size Exclusion Chromatography (SEC)

SEC was performed to measure polydispersity of a PS precursor and a PS-P4VP block copolymer by using three TSK-GEL G4000H<sub>HR</sub> columns combined with a DP-8020 dual pump and a UV detector (Tosoh Corp.). The eluent was dimethylformamide (DMF) and the flow rate was 1 ml/min. A calibration curve by polystyrene standards was basically used for all the measurements to estimate the PDIs.

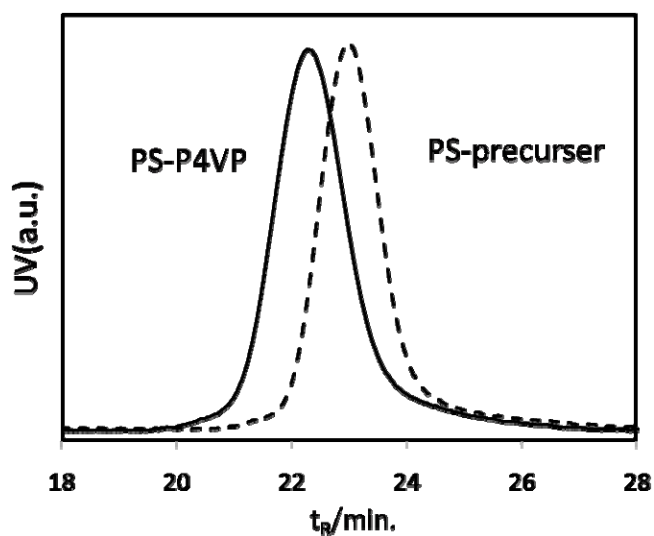

**Figure S1.** SEC chromatograms of a PS-P4VP block copolymer (solid line) and a PS precursor (dashed line).

## <sup>1</sup>H NMR

The molecular weight of a PS precursor was determined by <sup>1</sup>H NMR spectroscopy (Varian), by comparing the integral of peaks at 3.2 ppm from two protons at the end of the polymer adjacent to the CTA residue (S-C(=S)-S) with the integral of the peaks for the backbone (Figure S2). <sup>1</sup>H NMR was also used to measure the mole ratio of PS-P4VP (Figure S3). The solvent used for these experiments was deuterated chloroform (CDCl<sub>3</sub>).

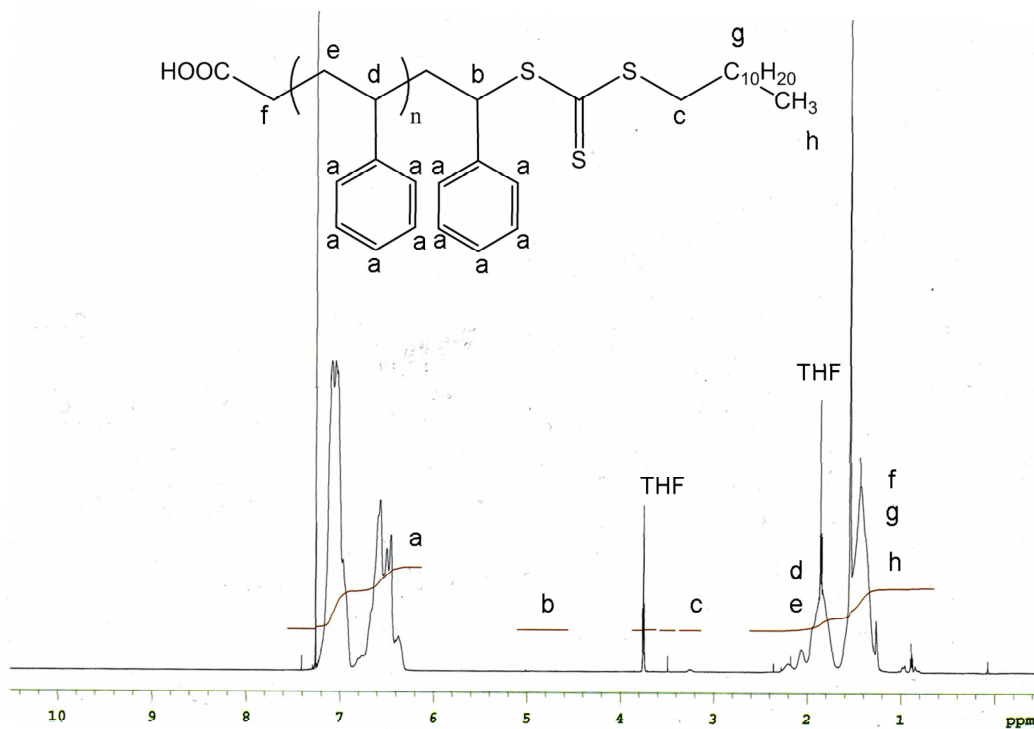

**Figure S2.** <sup>1</sup>H NMR spectrum of a PS precursor.

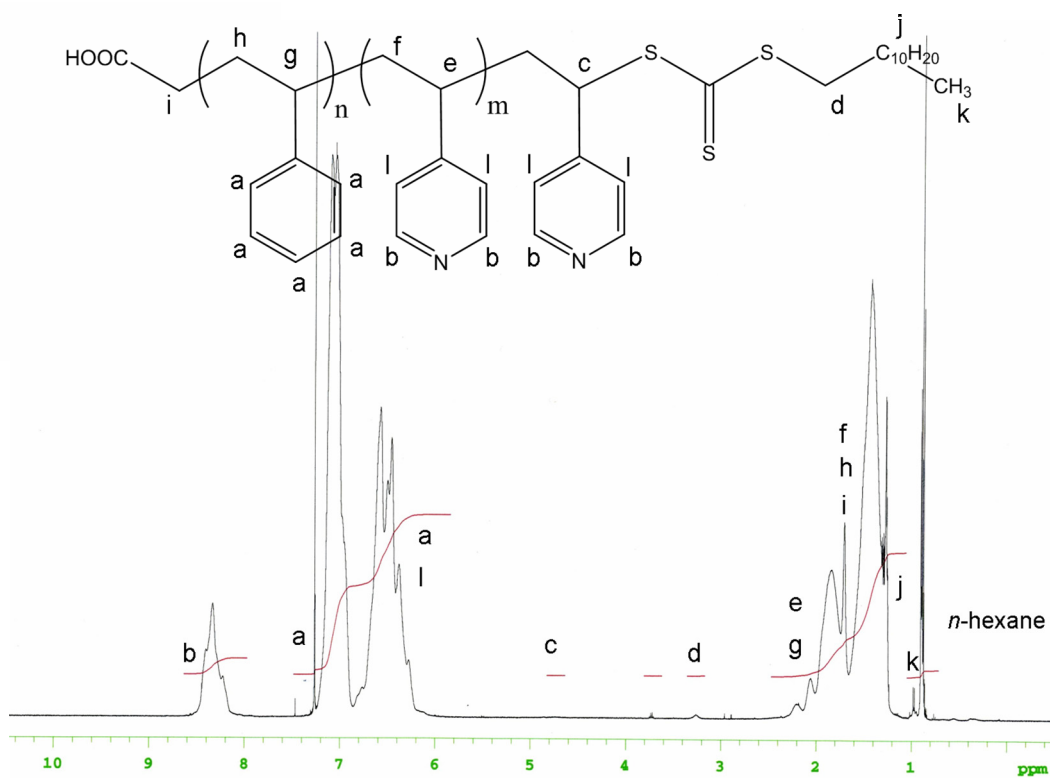

**Figure S3.**  $^1\text{H}$  NMR spectrum of a PS-P4VP block copolymer.
